# Supplementary material
Source: PubMed Central journal article supplement (PMC3117969)
Supplement: NIHMS295482-supplement-1.pdf [file NIHMS295482-supplement-1.pdf]

**Table 1. Primers for quantitation of mRNA by qRT-PCR (SYBR Green)**

| Gene Symbol    | Primer Sequence                                                                                     |
|----------------|-----------------------------------------------------------------------------------------------------|
| HIF-1 $\alpha$ | Forward: 5'- CTGCCACCACTGATGAATTA-3'<br>Reverse: 5'- GTATGTGGGTAGGAGATGGA-3'<br>Amplicon = 90 bp    |
| HIF-2 $\alpha$ | Forward: 5'- GCGCTAGACTCCGAGAACAT-3'<br>Reverse: 5'- TGGCCACTTACTACCTGACCCTT-3'<br>Amplicon = 71 bp |
| HIF-1 $\beta$  | Forward: 5'- GTGGCAGTAGCTCTGTGGACC-3'<br>Reverse: 5'- AGCCAAGTCCATTCTGTCAT-3'<br>Amplicon = 78 bp   |
| VEGFA          | Forward: 5'- GCACCCATGGCAGAAGG-3'<br>Reverse: 5'- CTCGATTGGATGGCAGTAGCT-3'<br>Amplicon = 90 bp      |
| GLUT1          | Forward: 5'- GATTGGCTCCTTCTCTGTGG-3'<br>Reverse: 5'- TCAAAGGACTTGCCCAGTTT-3'<br>Amplicon = 129 bp   |
| DEC1/BHLHE40   | Forward: 5'- GCAGACAGGAGCGCGCAGTG-3'<br>Reverse: 5' GTGGGCAGGGTACATCCCTGGT-3'<br>Amplicon = 134     |
| 18S            | Forward: 5'- CGGACAGGATTGACAGATTG-3'<br>Reverse: 5'- CAAATCGCTCCACCACTAA-3'<br>Amplicon = 83 bp     |

**Table 2. Primers for quantitation of ChIP-isolated genomic DNA by qRT-PCR (SYBR Green)**

| Gene Symbol            | Primer Sequence                                                                                    |
|------------------------|----------------------------------------------------------------------------------------------------|
| HIF1A-P<br>(proximal)  | Forward: 5'-CGCTAAACACAGACGAGCAC-3'<br>Reverse: 5'-GGGTTCTCGAGATCCAATG-3"<br>Amplicon = 142 bp     |
| HIF-1A-D<br>(distal)   | Forward: 5'-CCCCTATGTTCCACCTATGC-3'<br>Reverse: 5'-TCCAACCTACAGCGTTCTGG-3'<br>Amplicon = 111 bp    |
| HIF-2A-P<br>(proximal) | Forward: 5'-GAGCTTTACACTCGCGAGCGGA-3'<br>Reverse: 5'-AGGACACTGCCGAGGATTGTAC-3'<br>Amplicon = 98 bp |
| HIF-2A-D<br>(distal)   | Forward: 5'-ACTCCTGGTCACCCCTCAAG-3'<br>Reverse: 5'-TTTCTGGGAGCTCAGAATGG-3'<br>Amplicon = 122       |
| VEGFA                  | Forward: 5'-AGACTCCACAGTGCATACGTG-3'<br>Reverse: 5'-AGTGTGTCCCTCTGACAATG-3'<br>amplicon = 245 bp   |
| RAD51                  | Forward: 5'-CCCCCGGCATAAAGTTTGAAT-3'<br>Reverse: 5'-GAAGCGCCGCACTCTCCTTA-3'<br>amplicon = 263 bp   |

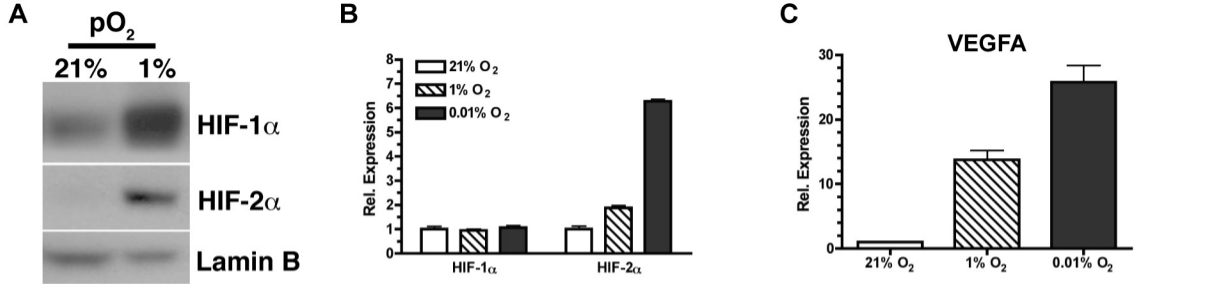

**Supplementary Figure 1. Effects of hypoxia on the expression of *HIF-1α*, *HIF-2α* and *VEGFA* in human glioblastoma U373 cells.** Cells were exposed to hypoxic conditions (1% or 0.01% O<sub>2</sub>) for 24 hr or maintained under normoxic culture condition (21% O<sub>2</sub>). (A) Whole-cell extracts were used for detection of HIF-1α and HIF-2α, respectively, using Western blots with lamin B as a loading control. (B, C) Total RNA was isolated for quantitative analysis of gene expression by qRT-PCR (mean ± sd).
